1 **Spatio-temporal distribution of rhinovirus types in Kenya: A retrospective**  
2 **analysis, 2014**

3

4 John Mwita Morobe<sup>1,\*</sup>, Everlyn Kamau<sup>2</sup>, Martha M. Luka<sup>1</sup>, Nickson Murunga<sup>1</sup>, Clement  
5 Lewa<sup>1</sup>, Martin Mutunga<sup>1</sup>, Godfrey Bigogo<sup>3</sup>, Nancy Otieno<sup>3</sup>, Bryan Nyawanda<sup>3</sup>, Clayton  
6 Onyango<sup>4</sup>, D. James Nokes<sup>1,5</sup>, Charles N. Agoti<sup>1,6</sup>, Patrick K. Munywoki<sup>1,4</sup>,

7

8 **Affiliations**

9 <sup>1</sup> Epidemiology and Demography Department, KEMRI-Wellcome Trust Research  
10 Programme, Centre for Geographic Medicine Research – Coast, Kilifi, Kenya.

11 <sup>2</sup> Nuffield Department of Medicine, University of Oxford, Oxford, UK

12 <sup>3</sup> KEMRI- Centre for Global Health Research, Kisumu, Kenya.

13 <sup>4</sup> U.S Centers for Disease Control and Prevention (CDC), Centers for Global Health, Division  
14 of Global Health Protection, Nairobi, Kenya.

15 <sup>5</sup> School of Life Sciences and Zeeman Institute for Systems Biology and Infectious Disease  
16 Epidemiology Research (SBIDER), University of Warwick, Coventry, United Kingdom.

17 <sup>6</sup> Department of Public Health, Pwani University, Kilifi, Kenya.

18

19 **Corresponding author:** [Jmwita@kemri-wellcome.org](mailto:Jmwita@kemri-wellcome.org)

20

21 **Key words:** rhinovirus, phylogenetics, transmission, spatio-temporal distribution,  
22 Kenya

23

24

25

26

## 27 **Abstract**

28 Rhinoviruses (RVs) are one of the most commonly detected viruses in people with  
29 acute respiratory illness (ARI). Despite their significant disease burden, RV  
30 epidemiology at national levels is underexplored. The circulation patterns of RV types  
31 throughout a population and the role of virus genotype in this distribution are ill-  
32 defined. We generated 803 VP4/VP2 gene sequences from rhinovirus-positive  
33 samples collected from ARI patients, including both in-patient and outpatient cases,  
34 between 1<sup>st</sup> January and 31<sup>st</sup> December 2014 from eleven surveillance sites across  
35 Kenya and used phylogenetics to characterise virus introductions and spread. RVs  
36 were detected throughout the year, with the highest detection rates observed from  
37 January to March and June to July. We detected a total of 114 of the 169 currently  
38 classified types. Our analysis revealed numerous virus introductions into Kenya  
39 characterized by local expansion and extinction, and extensive spatial mixing of types  
40 within the country due to the widespread transmission of the virus after an introduction.  
41 This work demonstrates that in a single year, the circulation of rhinovirus in Kenya was  
42 characterized by substantial genetic diversity, multiple introductions, and extensive  
43 geographical spread.

## 44 **Introduction**

45 Rhinoviruses (RVs) are one of the leading cause of acute upper respiratory tract  
46 illnesses, commonly referred to as "common cold"<sup>1,2</sup>. RV infections occur all year,  
47 although they peak in early autumn and late spring in many temperate countries, and  
48 in the rainy seasons in tropical countries<sup>2,3</sup>. RVs cause 8 – 12 episodes of respiratory  
49 infections in children and 2 – 4 episodes in adults each year<sup>4-6</sup>, posing significant  
50 social and economic burden due to time lost from work or school, medical attendance,  
51 and reduced performance of regular duties<sup>7</sup>. Despite the high prevalence and clinical

52 importance of RV infections, little is known about the patterns of occurrence of RV  
53 types, as well as the role of virus type in the RV distribution.

54 RVs belong to the genus *Enterovirus* of the family *Picornaviridae*. The virus  
55 genome consists of ~7200 nucleotides and encodes four structural proteins (VP4,  
56 VP2, VP3 and VP1) and seven non-structural proteins (2A, 2B, 2C, 3A, 3B, 3C and  
57 3D)<sup>2</sup>. The single-stranded positive sense RNA genome is enclosed within a protein  
58 capsid that is made up of sixty copies of each of the four structural proteins, of which  
59 VP1, VP2, and VP3 are exposed outside, while VP4 is completely masked in the  
60 capsid<sup>2,8,9</sup>. The three surface-exposed capsid proteins carry the antigenically  
61 important sites<sup>2,8,9</sup>. Genetic variation in the VP4/VP2 and VP1 genomic regions have  
62 been useful in molecular typing<sup>10,11</sup> and epidemiological investigations<sup>12–14</sup>. As of 15<sup>th</sup>  
63 March 2023, a total of 169 RV types have been described and classified into three  
64 distinct species, i.e., *Rhinovirus A*, *Rhinovirus B*, and *Rhinovirus C*<sup>15</sup>.

65 Viral sequence data are increasingly used to track the geographic spread and  
66 transmission of viral pathogens<sup>16,17</sup>. Genomic data has considerably informed public  
67 health interventions and outbreak management for viral pathogens, e.g., SARS-CoV-  
68 2, Ebolavirus, and Zika virus<sup>18–21</sup>. Widespread spatial and temporal transmission  
69 patterns of RV was previously described within the Kilifi Health and Demographic  
70 Surveillance System (KHDSS) on the Kenyan Coast covering around 300,000  
71 residents<sup>22</sup> and marked by multiple virus introductions<sup>12</sup>. Transmission patterns of RV  
72 at a nationwide scale have not been documented in Kenya. Here we analyze 803  
73 sequences obtained from individuals presenting with acute respiratory illness (ARIs)  
74 at 11 sentinel surveillance sites across Kenya in 2014<sup>23</sup>, to explore the temporal and  
75 spatial circulation patterns of RV types at the countrywide scale.

76

## 77 **Methods**

### 78 **Ethical considerations**

79 The study was approved by the Kenya Medical Research Institute - Scientific and  
80 Ethical Review Unit (SSC #3044) and CDC Institutional Review Board (#6806) to use  
81 pre-existent, pseudonymized specimens, and data. All individuals, parents and  
82 guardians gave written informed consent for themselves or their children to participate  
83 in the original studies<sup>23</sup>. For older children aged 13–17 years, assent was obtained as  
84 part of the individual informed consenting process.

85

### 86 **Surveillance sites**

87 This study utilised samples collected throughout the surveillance period covering 1<sup>st</sup>  
88 January to 31<sup>st</sup> December 2014 from three health facility-based respiratory virus  
89 surveillance programs in Kenya (Table 1 and Figure 1). The first program included  
90 eight inpatient hospitals participating in the influenza sentinel surveillance : Dadaab  
91 Refugee Camp (RC), Kakuma RC, Kenyatta National Hospital (KNH), Nakuru County  
92 Referral Hospital (CRH), Kakamega CRH, Nyeri CRH, Siaya CRH and Coast General  
93 Teaching and Referral Hospital<sup>24–26</sup>; the second included two outpatient clinics; Lwak  
94 Mission Hospital, Asembo and Tabitha Medical Clinic, Kibera under Population-Based  
95 Infectious Disease Surveillance (PBIDS)<sup>27</sup>, and the third program was a pediatric  
96 inpatient sampling at the Kilifi County Hospital (KCH)<sup>28</sup>. The influenza sentinel  
97 surveillance was established by Kenya Medical Research Institute-Centre for Global  
98 Research (KEMRI-CGHR), the US Centers for Disease Control and Prevention  
99 (CDC)-Kenya, and the Ministry of Health as part of the Global Influenza Surveillance  
100 and Response System since 2006<sup>24</sup>. The PBIDS platform in Asembo and Kibera is  
101 run by KEMRI-CGHR with financial and technical support from CDC since 2006<sup>29</sup>.

102 Surveillance at KCH is conducted by the KEMRI-Centre for Geographic Medical  
103 Research Coast (CGMRC) under KEMRI-Wellcome Trust Research Programme  
104 (KWTRP) in Kilifi, Kenya<sup>28</sup>. Overall, the selected surveillance sites offer a good  
105 representation of the various geographical settings in Kenya.

106

### 107 **Patient enrollment**

108 The surveillance sites recruited patients of various ages presenting with acute  
109 respiratory illness (ARI) with a measured fever of  $\geq 38^{\circ}\text{C}$  and a cough with an onset of  
110 symptoms within the last 7 days (influenza-like illness, ILI) or acute respiratory illness  
111 requiring hospitalization with a history of fever or measured fever  $\geq 38^{\circ}\text{C}$  and a cough  
112 with an onset of symptoms within the last 14 days (severe acute respiratory illness,  
113 SARI), or acute lower respiratory tract illness (ALRTI) defined as the presence of  
114 cough OR difficulty in breathing with one of the following danger signs: chest in-  
115 drawing, stridor, unable to breastfeed, vomit everything, convulsions, lethargy, or  
116 unconsciousness or an adaptation of WHO severe/very severe pneumonia as  
117 described in a **Table 1**. The different case definitions were consistently applied within  
118 each platform over the course of the study period.

### 119 **Data and specimen collection**

120 Patient demographic data and clinical features of presenting illness were collected in  
121 real-time using custom designed databases. Nasopharyngeal (NP) and/or  
122 oropharyngeal (OP) swabs were collected from eligible patients who presented to  
123 health facilities with clinical features of an acute respiratory illness as describe in  
124 patient enrolment section. NP/OP samples were stored in viral transport media, and  
125 transported to the laboratory for long-term storage at  $-80^{\circ}\text{C}$ .

126

## 127 **RV screening and sequencing**

128 Viral RNA was extracted using RNeasy Mini Kit (Qiagen, Germany) in Qiacube HT as  
129 per the manufacturer's instructions and screened for respiratory viruses (i.e. RSV  
130 (groups A and B), rhinovirus, human coronaviruses (hCoV-OC43, -NL63, -229E),  
131 influenza A virus and adenovirus) using a multiplex real-time reverse-transcription  
132 PCR (rt-RT-PCR) assay<sup>30,31</sup>. A sample was considered RV positive if the rt-RT-PCR  
133 cycle threshold (Ct) was  $\leq 35.0$ <sup>32</sup>. The VP4/VP2 viral genomic region (~420 nucleotides  
134 long) of positive samples was amplified and sequenced as previously described<sup>33</sup>.  
135 Consensus sequences were assembled using the Sequencher software version 5.4.6  
136 (Gene Codes Corporation, Ann Arbor, USA).

137

## 138 **RV species and type assignment**

139 We used the term 'type' to refer to RV sequences classified as distinct by genetic  
140 comparisons as described previously<sup>11</sup>. Sequences were assigned into the same RV  
141 type based on >90% nucleotide similarity to rhinovirus prototype sequences (also  
142 referred to as reference sequences<sup>11</sup> and phylogenetic clustering with bootstrap  
143 support value >70%<sup>11</sup>. Distributions of pairwise genetic distances were assessed for  
144 evaluation of intertype and intra-type divergence<sup>11</sup>. Intra-type 'variant' was defined  
145 based on a divergence cut-off or threshold value determined as the least frequent  
146 value between the first (same phylogenetic clade) and second (different phylogenetic  
147 clades) modes in a pairwise nucleotide difference distribution plot as previously  
148 described<sup>34</sup>. Viruses within the same phylogenetic clade were assumed to belong to  
149 the same variant of an RV type.

150

## 151 **Global dataset**

152 Rhinovirus VP4/VP2 sequences from other regions around the world deposited in  
153 GenBank as of 31 December 2021, whose sequenced regions overlapped the 803  
154 Kenyan sequences generated in this study and derived from viruses sampled between  
155 1<sup>st</sup> January 2005 and 31<sup>st</sup> December 2014, were collated and phylogenetically  
156 compared with the Kenya virus sequences. The complete comparison global data set  
157 comprised 4,448 VP4/VP2 sequences from 40 countries, including 653 sequences  
158 from Kenya (Kilifi (n=627), Nairobi (n=10), Mombasa (n=4), Malindi (n=3), Alupe (n=3),  
159 Kisumu (n=2), Isiolo (n=2), Kisii (n=1) and Kericho (n=1) (Appendix Table 1).

160

### 161 **Phylogenetic analysis**

162 Multiple sequence alignments (MSA) were generated using MAFFT v7.220<sup>35</sup> and  
163 maximum likelihood phylogenetic trees estimated using IQ-TREE v1.6.12<sup>36</sup>. Branch  
164 support was assessed by 1000 bootstrap iterations. The temporal signal in the data  
165 was examined using TempEst v1.5.3<sup>37</sup>. TreeTime v.0.8.1 was used to transform the  
166 ML tree topologies into dated trees. Phylogenetic trees were visualized using ggtree  
167 v2.2.4 package<sup>38</sup> in R<sup>39</sup>.

168

### 169 **Statistical analysis.**

170 Statistical analysis was conducted using STATA version 15.1 (College Station,  
171 Texas). Site-specific monthly percent virus positivity was computed.

172

173

174

175

176

## 177 **Type diversity calculation**

178 RV type diversity was calculated using diversity indices (Shannon (H) and Simpson

179 (D))<sup>40,41</sup>. The calculations were as follows:

180

$$181 \text{ Shannon Index (H)} = - \sum_{i=1}^s p_i \ln p_i$$

182

183

184

$$185 \text{ Simpson Index (D)} = \frac{1}{\sum_{i=1}^s p_i^2}$$

186

187

188 Where  $p$  is the proportion ( $n/N$ ) of individual types found in one individual species ( $n$ )

189 divided by the total number of types found ( $N$ ), and  $s$  is the total number of species.

190 Higher scores of H and D indicates high diversity.



## 191 Results

192 Between 1<sup>st</sup> January and 31<sup>st</sup> December 2014, a total of 6398 NP and/or OP swabs  
193 samples were collected from patients who voluntarily presented to the eleven facilities  
194 with ARI. Testing was done on 5859 (91.6%) available samples, Table 2. Of the tested  
195 samples, 5665 (96.7%) were linked with their respective demographic and clinical  
196 data. Two hundred and fourteen samples (214) collected from Siaya and Kibera  
197 patients with missing data on respiratory symptoms were excluded from the study, the  
198 final analytical dataset comprised of 5451 specimens. RV was detected in 17.0%  
199 (924/5451) of samples collected from the 11 surveillance sites (Table 2). The percent  
200 of samples that were virus positive for RV infections varied by surveillance site; Siaya  
201 recorded the highest positives (24.0%) while Dadaab (10.4%) recorded the lowest  
202 (Table 2). Rhinovirus was detected throughout the year in most sites, although the  
203 prevalence of detections varied by month of sampling due to seasonal variation in  
204 SARI (Figure 2). Different sites experienced peak occurrence in different months, but  
205 a majority saw infection peaks between January - March (7/11) and June - July (5/11)  
206 (Figure 2). There was no RV detected in April in Kenyatta National Hospital (KNH) and  
207 in May in Kakuma and Kibera sites (Figure 2). There were no samples collected in  
208 Dadaab between July and September.

209 VP4/VP2 sequences were successfully obtained from 803/924 (87.0%) RV  
210 positive samples (Table 2). The remaining samples either failed to amplify with the  
211 VP4/VP2 specific primers (n=111) or were identified as non-RV enteroviruses (n=10).  
212 Overall, 492 (61.3%) sequences were classified as *Rhinovirus A* comprising 58 types;  
213 63 (7.8%) sequences were *Rhinovirus B* comprising 16 types, and 248 (30.9%) were  
214 *Rhinovirus C* comprising 40 types. The most detected types were A34 (n = 35), A22  
215 (n=30), A58 (n = 27), A12 (n = 25) and A78 (n = 23) (Supplementary Table 1). The

216 number of types largely reflected the number of samples sequenced and varied  
217 between sites (Supplementary Figure 1A). Comparison by care setting (i.e., outpatient  
218 vs. inpatient) or ARI definition (i.e., ILI vs. SARI vs. ALRTI) across different RV types  
219 revealed no significant differences in ARI definition (p-value 0.06) and care setting (p-  
220 value 0.2) (Supplementary Table 2). Rhinovirus type diversity per site calculated using  
221 the Shannon (H) and Simpson (D) indices indicated that Siaya had the highest value  
222 of diversity, followed by Lwak and Kilifi. Dadaab reported the lowest value of diversity  
223 (Table 3). All three RV species were detected in all sites, except for Dadaab, where  
224 *Rhinovirus B* was not detected (Supplementary Figure 1B). The proportions of RV  
225 species were similar in all the sites; *Rhinovirus A* (range, 51 - 75%) and *Rhinovirus C*  
226 (range, 17 - 46%) were frequently detected, while *Rhinovirus B* (range, 0 - 13%)  
227 infections were low or not detected (Supplementary Figure 1B).

228

### 229 **Spatial-temporal distribution of RV types in Kenya**

230 We identified up to 49 unique RV types co-circulating in a single month across the  
231 country, and/or up to 20 unique types within a single location in a single month  
232 (Supplementary Figure 2). The duration of circulation varied by RV type; several types  
233 occurred at a high prevalence and for consecutive months, while others occurred once  
234 or intermittently during the study period (Supplementary Figure 3). For example, RV-  
235 A22 was detected throughout the year, A34 was present for 11 consecutive months  
236 (February to December 2014), and RV-C7 and A21 circulated consecutively for 8  
237 months (February to September and May to December, respectively) (Supplementary  
238 Figure 3). Spatially, several RV types circulated widely; some circulated in multiple  
239 sites during the same timeframe, while others circulated in multiple sites at different  
240 times (Figure 3). For example, RV-A22 was detected in all 11 sites, while A34 was

241 detected in 10 sites. We observed the occurrence of localized type-specific epidemics  
242 or outbreaks; the distribution of RV types was similar between neighbouring locations  
243 (Figure 3). For example, types A21 and A78 circulated in Asembo, Siaya, and  
244 Kakamega in the same period (June-July), while A49 was seen in Mombasa and Kilifi  
245 between July and December (Figure 3). Other types were more random in occurrence  
246 with no discernable temporal or spatial pattern.

247

### 248 **Phylogenetic clustering**

249 We reconstructed time-scaled phylogenies for thirteen prevalent types. In the global  
250 context, Kenyan viruses formed monophyletic clusters/clades containing sequences  
251 from different sampling sites in Kenya, suggesting multiple introductions and local  
252 transmission chains (Figure 4). For example, the Kenyan RV-A22 viruses collected  
253 between 2008 and 2014 separated into 3 major clusters, each comprising sequences  
254 from different locations in Kenya. Similarly, A34 viruses collected in 2014 separated  
255 into 2 major clusters, each with sequences from different sites (Figure 4). Similar  
256 observations were observed for other RV types including, A12, A49, A58, A78, and  
257 C10 (Figure 4). Certain clades or clusters were location-specific and genetically  
258 distinct from other Kenyan 2014 sequences. For example, an A78 variant from Nyeri  
259 and an A58 variant in Dadaab (Figure 4), showing evidence of localised transmission  
260 clusters.

261 Sequences originating from Kenya did not form a single monophyletic group on  
262 the phylogenetic tree, instead, they were interspersed mostly as singleton or clusters  
263 located separately or with clusters of viruses from other countries. For example, RV-  
264 A22 sequences from Kenya clustered closely with sequences from China and France  
265 in 2014, while A12 sequences clustered closely with sequences from China, the USA,

266 France, Uganda, and Nepal in 2014. The Kenyan A58 sequences clustered closely  
267 with those from USA and France, while the A78 sequences clustered closely with  
268 Chinese and American sequences, and the A34 resembled Nepalese sequences.

269

## 270 **Discussion**

271 This study provides a detailed description of the spatial-temporal dynamics of  
272 introductions and spread of rhinovirus in Kenya based on phylogenetic analyses. We  
273 show that the persistent circulation of RV in Kenya was mostly driven by multiple  
274 introductions of different types throughout the one-year period, leading to established  
275 local transmission.

276 *Rhinovirus A* was the predominant species circulating in Kenya in 2014,  
277 followed by *Rhinovirus C*, and the least common was *Rhinovirus B*. This is consistent  
278 with a previous surveillance study across 8 sampling sites in Kenya in 2008<sup>42</sup>.  
279 Although differences in subject recruitment strategies may not allow one-on-one  
280 comparison between this study and others, these observations are similar to studies  
281 reported in Africa, USA, Asia, Europe, the Middle East, and Australia<sup>11,43</sup>. The  
282 similarities in frequencies of RV species in diverse geographies would suggest that  
283 RV circulates unrestricted globally.

284 RV was detected all year, with the highest detection rates observed in January  
285 to March and June to July. The year-round occurrence of rhinovirus in the country was  
286 largely sustained by contemporaneous and successive mini epidemics or outbreaks  
287 caused by distinct types and variants that were probably introduced separately into  
288 the country or diversified locally after a single introduction.

289 Spatial-temporal analysis revealed occurrence of multiple types and variants  
290 across space and time in agreement with previous studies<sup>12,14,44</sup>. The observed

291 variations in time and duration of circulation among the rhinovirus types could be due  
292 to (i) differences in the duration of type-specific immunity, (ii) frequency of introductions  
293 or, iii) level of antigenic similarity (heterologous immunity)<sup>34</sup>. The concurrent and  
294 sequential circulation of RV types seen as the occurrence of multiple peaks of the  
295 same type in the same or distant locations could signify multiple introductions,  
296 antigenic variation, or infections in different population strata<sup>34</sup>. The heterogeneity in  
297 RV detection by month and location could be attributed to the seasonal variation in  
298 SARI or sampling methods or to regional differences in environmental and climatic  
299 factors. Climatic factors such as temperature, rainfall, and relative humidity have been  
300 hypothesized to influence RV activity in the tropics<sup>3,45,46</sup>.

301 Even with non-uniform sampling and short duration of study (1 year), we  
302 showed close genetic association among sequences from different sites as a result of  
303 widespread transmission of the virus in the country. On a finer spatial scale, study  
304 sites occurring within the same geographical region (as described in Table 1) had a  
305 similar distribution of RV types, an indicator of a point source outbreak, in which a  
306 single virus type enters a location and diffuses through the interconnected populations  
307 probably sharing social amenities<sup>12</sup>. This agrees with our previous work that showed  
308 greater similarity in RV types among the locations in proximity<sup>12</sup>.

309 The global phylogenies showed that RV viruses circulating in Kenya were  
310 closely related to strains circulating in Europe, Asia, and North America. The Kenyan  
311 RV diversity appears to be nested within the global diversity as a result of transmission  
312 facilitated by unrestricted movement, increased connectivity, and social mixing.

313 Although our analyses were limited to the VP4/VP2 genomic region, we  
314 highlight the use of sequence data to trace the introduction and spread of rhinovirus  
315 at the countrywide level and show the benefit of systematic, continuous, and

316 geographically representative surveillance to detect and monitor the occurrence of  
317 types at a larger scale. Whole genome sequencing could provide more insight into  
318 virus diversity and transmission<sup>47</sup>, and we recommend that future studies should  
319 combine genomic data with epidemiological and anthropological data (e.g., host  
320 migration, immunity profiles, population densities, and social contact patterns) to  
321 further elucidate patterns of RV infections.

322         This study had some limitations. First, due to the retrospective approach of the  
323 study, it was not possible to recover sequences from all the samples due to sample  
324 degradation; samples (n=111/924) that failed sequencing had considerably higher Ct  
325 values (low viral load) compared to samples that were successfully sequenced with  
326 low Ct values (high viral load). Second, there were varying study design by sites, for  
327 instance, the disease case definition and ages enrolled. The varying designs would  
328 mainly affect the virus positivity estimates observed over the one-year surveillance  
329 period, in that sites that had more inclusive case definition that includes mild cases of  
330 respiratory illnesses may exhibit higher rates of rhinovirus positivity compared to sites  
331 using a more restrictive case definition that only includes severe cases of respiratory  
332 illnesses. Third, the inclusion of fever as a criterion in most of the case definitions used  
333 may lead to the underestimation of RV prevalence since many RV infections, including  
334 severe cases, do not necessarily manifest with fever. Consequently, there is a  
335 possibility that we might have missed RV patients who do not exhibit fever symptoms,  
336 potentially impacting the overall assessment of RV prevalence in our study. Fourth,  
337 the short sequence fragment analysed in this study may result in spurious  
338 phylogenetic connections. Lastly, the study focused on samples that were collected in  
339 hospital settings, which may have missed genotypes associated with asymptomatic or  
340 mildly ill infections.

341           In conclusion, our study demonstrates that sustained circulation of the virus in  
342 2014 was due to frequent introductions of different types and variants into the country  
343 followed by local spread for some of these introductions. Temporal differences in  
344 persistence of rhinovirus types over the one-year period, could be attributed to  
345 differences in the frequency and number of virus introductions into the country. Spatial  
346 patterns show extensive spread of the virus, and the evidence of similar distribution of  
347 types in locations that are in proximity to each other may indicate local partitioning or  
348 spatial structures of virus transmission.

## 349 Reference

- 350 1. Ouédraogo S, Traoré B, Nene Bi ZAB, et al. Viral Etiology of Respiratory Tract  
351 Infections in Children at the Pediatric Hospital in Ouagadougou (Burkina Faso). *PLoS*  
352 *One*. 2014;9(10):e110435.
- 353 2. Jacobs SE, Lamson DM, St George K, Walsh TJ. Human rhinoviruses. *Clin Microbiol*  
354 *Rev*. 2013;26(1):135-162. doi:10.1128/CMR.00077-12
- 355 3. Garcia J, Espejo V, Nelson M, et al. Human rhinoviruses and enteroviruses in  
356 influenza-like illness in Latin America. *Virol J*. 2013;10:305. doi:10.1186/1743-422X-  
357 10-305
- 358 4. Nguyen DNT, Mai LQ, Bryant JE, et al. Epidemiology and etiology of influenza-like-  
359 illness in households in Vietnam; it's not all about the kids! *J Clin Virol*. 2016;82:126-  
360 132. doi:10.1016/j.jcv.2016.07.014
- 361 5. Kamau E, Onyango CO, Otieno GP, et al. An Intensive, Active Surveillance Reveals  
362 Continuous Invasion and High Diversity of Rhinovirus in Households. *J Infect Dis*.  
363 2019;219(7):1049-1057. doi:10.1093/infdis/jiy621
- 364 6. Arruda E, Pitkaranta A, Witek TJJ, Doyle CA, Hayden FG. Frequency and natural  
365 history of rhinovirus infections in adults during autumn. *J Clin Microbiol*.  
366 1997;35(11):2864-2868.
- 367 7. Fendrick AM, Monto AS, Nightengale B, Sarnes M. The economic burden of non-  
368 influenza-related viral respiratory tract infection in the United States. *Arch Intern Med*.  
369 2003;163(4):487-494. doi:10.1001/archint.163.4.487 [pii]
- 370 8. Esneau C, Bartlett N, Bochkov YA. Chapter 1 - Rhinovirus structure, replication, and  
371 classification. In: Bartlett N, Wark P, Knight D, eds. *Rhinovirus Infections*. Academic  
372 Press; 2019:1-23. doi:https://doi.org/10.1016/B978-0-12-816417-4.00001-9
- 373 9. Stobart CC, Nosek JM, Moore ML. Rhinovirus Biology, Antigenic Diversity, and  
374 Advancements in the Design of a Human Rhinovirus Vaccine. *Front Microbiol*.  
375 2017;8. doi:10.3389/fmicb.2017.02412
- 376 10. Simmonds P, McIntyre C, Savolainen-Kopra C, Tapparel C, Mackay IM, Hovi T.  
377 Proposals for the classification of human rhinovirus species C in genotypically  
378 assigned types. *J Gen Virol*. 2010;91. doi:10.1099/vir.0.023994-0 LB -  
379 Simmonds2010
- 380 11. McIntyre CL, Knowles NJ, Simmonds P. Proposals for the classification of human  
381 rhinovirus species A, B and C into genotypically assigned types. *J Gen Virol*.  
382 2013;94(Pt 8):1791-1806. doi:10.1099/vir.0.053686-0
- 383 12. Morobe JM, Nyiro JU, Brand S, et al. Human rhinovirus spatial-temporal  
384 epidemiology in rural coastal Kenya, 2015-2016, observed through outpatient  
385 surveillance [version 2; peer review: 2 approved]. *Wellcome Open Res*. 2019;3(128).  
386 doi:10.12688/wellcomeopenres.14836.2
- 387 13. Arakawa M, Okamoto-Nakagawa R, Toda S, et al. Molecular epidemiological study of  
388 human rhinovirus species A, B and C from patients with acute respiratory illnesses in  
389 Japan. *J Med Microbiol*. 2012;61:410-419. doi:10.1099/jmm.0.035006-0
- 390 14. van der Linden L, Bruning AHL, Thomas X V, et al. A molecular epidemiological  
391 perspective of rhinovirus types circulating in Amsterdam from 2007 to 2012. *Clin*  
392 *Microbiol Infect*. 2016;22(12):1002.e9-1002.e14. doi:10.1016/j.cmi.2016.08.007
- 393 15. The Picornavirus Pages. Enteroviruses. Enteroviruses. Published 2006. Accessed  
394 March 15, 2023.  
395 <https://www.picornaviridae.com/ensavirinae/enterovirus/enterovirus.htm>
- 396 16. Grubaugh ND, Ladner JT, Lemey P, et al. Tracking virus outbreaks in the twenty-first  
397 century. *Nat Microbiol*. 2019;4(1):10-19. doi:10.1038/s41564-018-0296-2



- 398 17. Gardy JL, Loman NJ. Towards a genomics-informed, real-time, global pathogen  
399 surveillance system. *Nat Rev Genet.* 2018;19(1):9-20. doi:10.1038/nrg.2017.88
- 400 18. Quick J, Loman NJ, Duraffour S, et al. Real-time, portable genome sequencing for  
401 Ebola surveillance. *Nature.* 2016;530(7589):228-232. doi:10.1038/nature16996
- 402 19. Eduan W, Marta G, Houriiyah T, et al. A year of genomic surveillance reveals how the  
403 SARS-CoV-2 pandemic unfolded in Africa. *Science (1979).* 2021;374(6566):423-431.  
404 doi:10.1126/science.abj4336
- 405 20. Gire SK, Goba A, Andersen KG, et al. Genomic surveillance elucidates Ebola virus  
406 origin and transmission during the 2014 outbreak. *Science (1979).* 2014;345:1369-  
407 1372. doi:10.1126/science.1259657
- 408 21. Faria NR, Quick J, Claro IM, et al. Establishment and cryptic transmission of Zika  
409 virus in Brazil and the Americas. *Nature.* 2017;546(7658):406-410.  
410 doi:10.1038/nature22401
- 411 22. Scott JAG, Bauni E, Moisi JC, et al. Profile: The Kilifi Health and Demographic  
412 Surveillance System (KHDSS). *Int J Epidemiol.* 2012;41(3):650-657.  
413 doi:10.1093/ije/dys062
- 414 23. Murunga N, Nyawanda B, Nyiro JU, et al. Surveillance of respiratory viruses at health  
415 facilities from across Kenya, 2014 [version 2; peer review: 1 approved with  
416 reservations] . *Wellcome Open Res.* 2022;7(234).  
417 doi:10.12688/wellcomeopenres.17908.2
- 418 24. Katz MA, Muthoka P, Emukule GO, et al. Results From the First Six Years of  
419 National Sentinel Surveillance for Influenza in Kenya, July 2007–June 2013. *PLoS*  
420 *One.* 2014;9(6):e98615-. <https://doi.org/10.1371/journal.pone.0098615>
- 421 25. Bigogo GM, Breiman RF, Feikin DR, et al. Epidemiology of Respiratory Syncytial  
422 Virus Infection in Rural and Urban Kenya. *J Infect Dis.* 2013;208(suppl\_3):S207-  
423 S216. doi:10.1093/infdis/jit489
- 424 26. Emukule GO, Khagayi S, McMorro ML, et al. The Burden of Influenza and RSV  
425 among Inpatients and Outpatients in Rural Western Kenya, 2009–2012. *PLoS One.*  
426 2014;9(8):e105543-. <https://doi.org/10.1371/journal.pone.0105543>
- 427 27. Feikin DR, Olack B, Bigogo GM, et al. The Burden of Common Infectious Disease  
428 Syndromes at the Clinic and Household Level from Population-Based Surveillance in  
429 Rural and Urban Kenya. *PLoS One.* 2011;6(1):e16085-.  
430 <https://doi.org/10.1371/journal.pone.0016085>
- 431 28. Nokes DJ, Ngama M, Bett A, et al. Incidence and severity of respiratory syncytial  
432 virus pneumonia in rural Kenyan children identified through hospital surveillance. *Clin*  
433 *Infect Dis.* 2009;49(9):1341-1349. doi:10.1086/606055
- 434 29. Feikin DR, Njenga MK, Bigogo G, et al. Etiology and Incidence of Viral and Bacterial  
435 Acute Respiratory Illness among Older Children and Adults in Rural Western Kenya,  
436 2007–2010. *PLoS One.* 2012;7(8):e43656-.  
437 <https://doi.org/10.1371/journal.pone.0043656>
- 438 30. Gunson RN, Collins TC, Carman WF. Real-time RT-PCR detection of 12 respiratory  
439 viral infections in four triplex reactions. *J Clin Virol.* 2005;33(4):341-344.  
440 doi:10.1016/j.jcv.2004.11.025
- 441 31. Hammitt LL, Kazungu S, Welch S, et al. Added value of an oropharyngeal swab in  
442 detection of viruses in children hospitalized with lower respiratory tract infection. *J*  
443 *Clin Microbiol.* 2011;49(6):2318-2320. doi:10.1128/JCM.02605-10
- 444 32. Onyango CO, Welch SR, Munywoki PK, et al. Molecular epidemiology of human  
445 rhinovirus infections in Kilifi, coastal Kenya. *J Med Virol.* 2012;84(5):823-831.  
446 doi:10.1002/jmv.23251

- 447 33. Morobe JM, Nyiro JU, Brand S, et al. Human rhinovirus spatial-temporal  
448 epidemiology in rural coastal Kenya, 2015-2016, observed through outpatient  
449 surveillance [version 2; peer review: 2 approved]. *Wellcome Open Res.* 2019;3(128).  
450 doi:10.12688/wellcomeopenres.14836.2
- 451 34. Mwita Morobe J, Kamau E, Murunga N, et al. Trends and Intensity of Rhinovirus  
452 Invasions in Kilifi, Coastal Kenya, Over a 12-Year Period, 2007–2018. *Open Forum*  
453 *Infect Dis.* 2021;8(12):ofab571. doi:10.1093/ofid/ofab571
- 454 35. Katoh K, Standley DM. MAFFT multiple sequence alignment software version 7:  
455 improvements in performance and usability. *Mol Biol Evol.* 2013;30(4):772-780.  
456 doi:10.1093/molbev/mst010
- 457 36. Nguyen LT, Schmidt HA, von Haeseler A, Minh BQ. IQ-TREE: a fast and effective  
458 stochastic algorithm for estimating maximum-likelihood phylogenies. *Mol Biol Evol.*  
459 2015;32(1):268-274. doi:10.1093/molbev/msu300
- 460 37. Rambaut A, Lam TT, Max Carvalho L, Pybus OG. Exploring the temporal structure of  
461 heterochronous sequences using TempEst (formerly Path-O-Gen). *Virus Evol.*  
462 2016;2(1). doi:10.1093/ve/vew007
- 463 38. Yu G, Smith DK, Zhu H, Guan Y, Lam TTY. ggtree: an r package for visualization  
464 and annotation of phylogenetic trees with their covariates and other associated data.  
465 *Methods Ecol Evol.* 2017;8(1):28-36. doi:https://doi.org/10.1111/2041-210X.12628
- 466 39. R Core Team. R: A language and environment for statistical computing. Published  
467 online 2013. Accessed November 9, 2021. URL <http://www.R-project.org/>
- 468 40. Spellerberg IF, Fedor PJ. A tribute to Claude Shannon (1916–2001) and a plea for  
469 more rigorous use of species richness, species diversity and the ‘Shannon–Wiener’  
470 Index. *Global Ecology and Biogeography.* 2003;12(3):177-179.  
471 doi:https://doi.org/10.1046/j.1466-822X.2003.00015.x
- 472 41. SIMPSON EH. Measurement of Diversity. *Nature.* 1949;163(4148):688.  
473 doi:10.1038/163688a0
- 474 42. Milanoi S, Ongus JR, Gachara G, Coldren R, Bulimo W. Serotype and genetic  
475 diversity of human rhinovirus strains that circulated in Kenya in 2008. *Influenza*  
476 *Other Respir Viruses.* 2016;10(3):185-191. doi:10.1111/irv.12373
- 477 43. Briese T, Renwick N, Venter M, et al. Global distribution of novel rhinovirus  
478 genotype. *Emerg Infect Dis.* 2008;14(6):944-947. doi:10.3201/eid1406.080271
- 479 44. Sansone M, Andersson M, Brittain-Long R, et al. Rhinovirus infections in western  
480 Sweden: a four-year molecular epidemiology study comparing local and globally  
481 appearing types. *Eur J Clin Microbiol Infect Dis.* 2013;32(7):947-954.  
482 doi:10.1007/s10096-013-1832-x
- 483 45. Monto AS. Epidemiology of viral respiratory infections. *Am J Med.* 2002;112  
484 Suppl:4S-12S. doi:10.1016/s0002-9343(01)01058-0
- 485 46. Arden KE, McErlean P, Nissen MD, Sloots TP, Mackay IM. Frequent detection of  
486 human rhinoviruses, paramyxoviruses, coronaviruses, and bocavirus during acute  
487 respiratory tract infections. *J Med Virol.* 2006;78(9):1232-1240.  
488 doi:https://doi.org/10.1002/jmv.20689
- 489 47. Luka MM, Kamau E, de Laurent ZR, et al. Whole genome sequencing of two human  
490 rhinovirus A types (A101 and A15) detected in Kenya, 2016-2018. *Wellcome Open*  
491 *Research 2021 6:178.* 2021;6:178. doi:10.12688/wellcomeopenres.16911.1
- 492 48. World Health Organisation. Pocket Book of Hospital Care for Children: Guidelines for  
493 the Management of Common Childhood Illnesses. 2013;(2nd edition).  
494

497 **Acknowledgements**

498 We thank all the study participants for their contribution of study specimens and data  
499 and surveillance staff from all the study sites included. We acknowledge the laboratory  
500 staff at KEMRI-Wellcome Trust Research Programme and CDC-supported laboratory  
501 at KEMRI-Centre for Global Health Research for specimen handling and testing. The  
502 primary data and specimen collection in Influenza surveillance and PBIDS sites were  
503 supported by U.S. Centers for Disease Control and Prevention while pediatric  
504 surveillance at Kilifi County Hospital was funded by the Wellcome Trust.

505

506 **Author Contributions**

507 J.M.M, E.K., C.A., PKM, D.J.N., Conceptualised and designed the study

508 J.M.M.,M.M.L, C.L., M.M., Provided laboratory sequencing and support

509 J.M.M., M.M.L, E.K., C.A., D.J.N., Provided phylogenetic analysis

510 J.M.M., N.M. Provided data curation and analysis

511 J.M.M., E.K., C.A., D.J.N., Wrote the original manuscript draft

512 All authors read and approved the final manuscript.

513

514 **Funding**

515 This work was supported by Wellcome [102975], and U.S. Centers for Disease Control  
516 and Prevention through Cooperative Agreement [#6U01GH002143].

517

518 **Data availability**

519 Sequence data generated in this study are available in GenBank under accession  
520 numbers: MZ129390 - MZ130096. Additional data and analysis scripts for this

521 manuscript are available at the VEC Harvard Dataverse:

522 <https://doi.org/10.7910/DVN/CBHVTA>

523

#### 524 **Conflicts of Interest**

525 The authors declare no competing interests. The funders had no role in the design of  
526 the study; in the collection, analyses, or interpretation of data; in the writing of the  
527 manuscript; or in the decision to publish the results.

528

#### 529 **Disclaimer**

530 The findings and conclusions in this report are those of the author(s) and do not  
531 necessarily represent the official position of U.S. the Centers for Disease Control and  
532 Prevention.

533 **Tables**

534 **Table 1:** Description of the 11 respiratory surveillance sites across Kenya.

| Surveillance site                    | Region      | Setting    | Inclusion criteria                    | Age included |
|--------------------------------------|-------------|------------|---------------------------------------|--------------|
| Kenyatta National Hospital (KNH)     | Central     | Inpatient  | SARI <sup>1</sup> & ILI <sup>2</sup>  | <13 years    |
| Nyeri County Referral Hospital       | Central     | Inpatient  | SARI <sup>1</sup>                     | All          |
| Mombasa County Referral Hospital     | Coast       | Inpatient  | SARI <sup>1</sup>                     | All          |
| Kilifi County Hospital               | Coast       | Inpatient  | Pneumonia <sup>4</sup>                | <5 years     |
| Kakuma Refugee Camp                  | North       | Inpatient  | SARI <sup>1</sup>                     | All          |
| Dadaab Refugee Camp                  | North       | Inpatient  | SARI <sup>1</sup>                     | All          |
| Nakuru County Referral Hospital      | Rift valley | Inpatient  | SARI <sup>1</sup>                     | All          |
| Siaya County Hospital                | Western     | Inpatient  | SARI <sup>1</sup>                     | All          |
| Kakamega County Referral Hospital    | Western     | Inpatient  | SARI <sup>1</sup>                     | All          |
| Lwak Mission Hospital, Asembo PBIDS* | Western     | Outpatient | ALRTI <sup>3</sup> & ILI <sup>2</sup> | All          |
| Tabitha Medical Clinic, Kibera PBIDS | Central     | Outpatient | ALRTI <sup>3</sup> & ILI <sup>2</sup> | All          |

535  
536 Key: 1, SARI, Severe Acute Respiratory Illness is defined as an acute respiratory  
537 illness requiring hospitalization with a history of fever or measured fever  $\geq 38^{\circ}\text{C}$  AND  
538 a cough with an onset of symptoms within the last 14 days. 2, ILI, Influenza Like Illness  
539 is defined as measured fever of  $\geq 38^{\circ}\text{C}$  OR sore throat in an outpatient of any age. 3,  
540 ALRTI, Acute lower respiratory tract illness is defined as presence of cough OR  
541 difficulty in breathing with one of the following danger signs: chest in-drawing, stridor,  
542 unable to breastfeed, vomit everything, convulsions, lethargy, or unconsciousness. 4,  
543 Pneumonia is defined as modified WHO syndromic severe or very severe  
544 pneumonia<sup>48</sup>; PBIDS, Population-Based Infectious Disease Surveillance.

545 **Table 2:** Description of samples collected per site, cases positives for RV, and samples sequenced in the VP4/VP2 coding region.

| Surveillance site                    | NP/OP collections | Tested      | Linkage with clinical and demographic data | With respiratory symptoms | Samples positive for HRV | % Positivity | VP4/VP2 sequenced (%) |
|--------------------------------------|-------------------|-------------|--------------------------------------------|---------------------------|--------------------------|--------------|-----------------------|
| Kenyatta National Hospital (KNH)     | 510               | 357         | 343                                        | 343                       | 64                       | 18.7         | 63 (99)               |
| Nyeri County Referral Hospital       | 482               | 427         | 425                                        | 425                       | 68                       | 16.0         | 57 (84)               |
| Mombasa County Referral Hospital     | 524               | 455         | 445                                        | 445                       | 103                      | 23.1         | 87 (85)               |
| Kilifi County Hospital               | 722               | 722         | 722                                        | 722                       | 113                      | 15.7         | 96 (85)               |
| Kakuma Refugee Camp                  | 220               | 175         | 175                                        | 175                       | 25                       | 14.3         | 23 (92)               |
| Dadaab Refugee Camp                  | 189               | 158         | 154                                        | 154                       | 16                       | 10.4         | 13 (81)               |
| Nakuru County Referral Hospital      | 811               | 714         | 712                                        | 712                       | 126                      | 17.7         | 103 (82)              |
| Siaya County Referral Hospital       | 936               | 922         | 794                                        | 642                       | 154                      | 24.0         | 128 (83)              |
| Kakamega County Referral Hospital    | 464               | 418         | 402                                        | 402                       | 72                       | 17.9         | 65 (91)               |
| Lwak Mission Hospital, Asembo PBIDS* | 879               | 862         | 862                                        | 862                       | 117                      | 13.6         | 108(92)               |
| Tabitha Medical Clinic, Kibera PBIDS | 640               | 631         | 631                                        | 569                       | 66                       | 11.6         | 60 (91)               |
| <b>Not recorded</b>                  | 21                | 18          | 0                                          | 0                         | 0                        | 0            | 0                     |
| <b>Total</b>                         | <b>6398</b>       | <b>5859</b> | <b>5665</b>                                | <b>5451</b>               | <b>924</b>               | <b>17.0</b>  | <b>803 (86.0)</b>     |

546

547 Abbreviations : PBIDS, Population-Based Infectious Disease Surveillance.

548 **Table 3:** Rhinovirus type diversity measured using Shannon (H) and Simpson (D) diversity indices.

| Site     | Number of sequences | Sequences per species |      |      | Number of types | Shannon's diversity (H) | Simpson diversity (G) |
|----------|---------------------|-----------------------|------|------|-----------------|-------------------------|-----------------------|
|          |                     | RV-A                  | RV-B | RV-C |                 |                         |                       |
| KNH      | 63                  | 32                    | 2    | 29   | 32              | 3.31                    | 23.68                 |
| Nyeri    | 57                  | 31                    | 3    | 23   | 35              | 3.38                    | 24.43                 |
| Mombasa  | 87                  | 54                    | 3    | 30   | 42              | 3.58                    | 30.82                 |
| Kilifi   | 96                  | 54                    | 7    | 35   | 46              | 3.69                    | 34.79                 |
| Kakuma   | 23                  | 14                    | 1    | 8    | 15              | 2.56                    | 10.76                 |
| Dadaab   | 13                  | 7                     | 0    | 6    | 9               | 2.09                    | 7.20                  |
| Nakuru   | 103                 | 61                    | 7    | 35   | 50              | 3.66                    | 28.74                 |
| Siaya    | 128                 | 90                    | 16   | 22   | 56              | 3.79                    | 34.66                 |
| Kakamega | 65                  | 49                    | 4    | 12   | 33              | 3.29                    | 22.59                 |
| Asembo   | 108                 | 65                    | 14   | 29   | 52              | 3.74                    | 34.23                 |
| Kibera   | 60                  | 33                    | 5    | 22   | 38              | 3.47                    | 26.17                 |

550 **Figures**

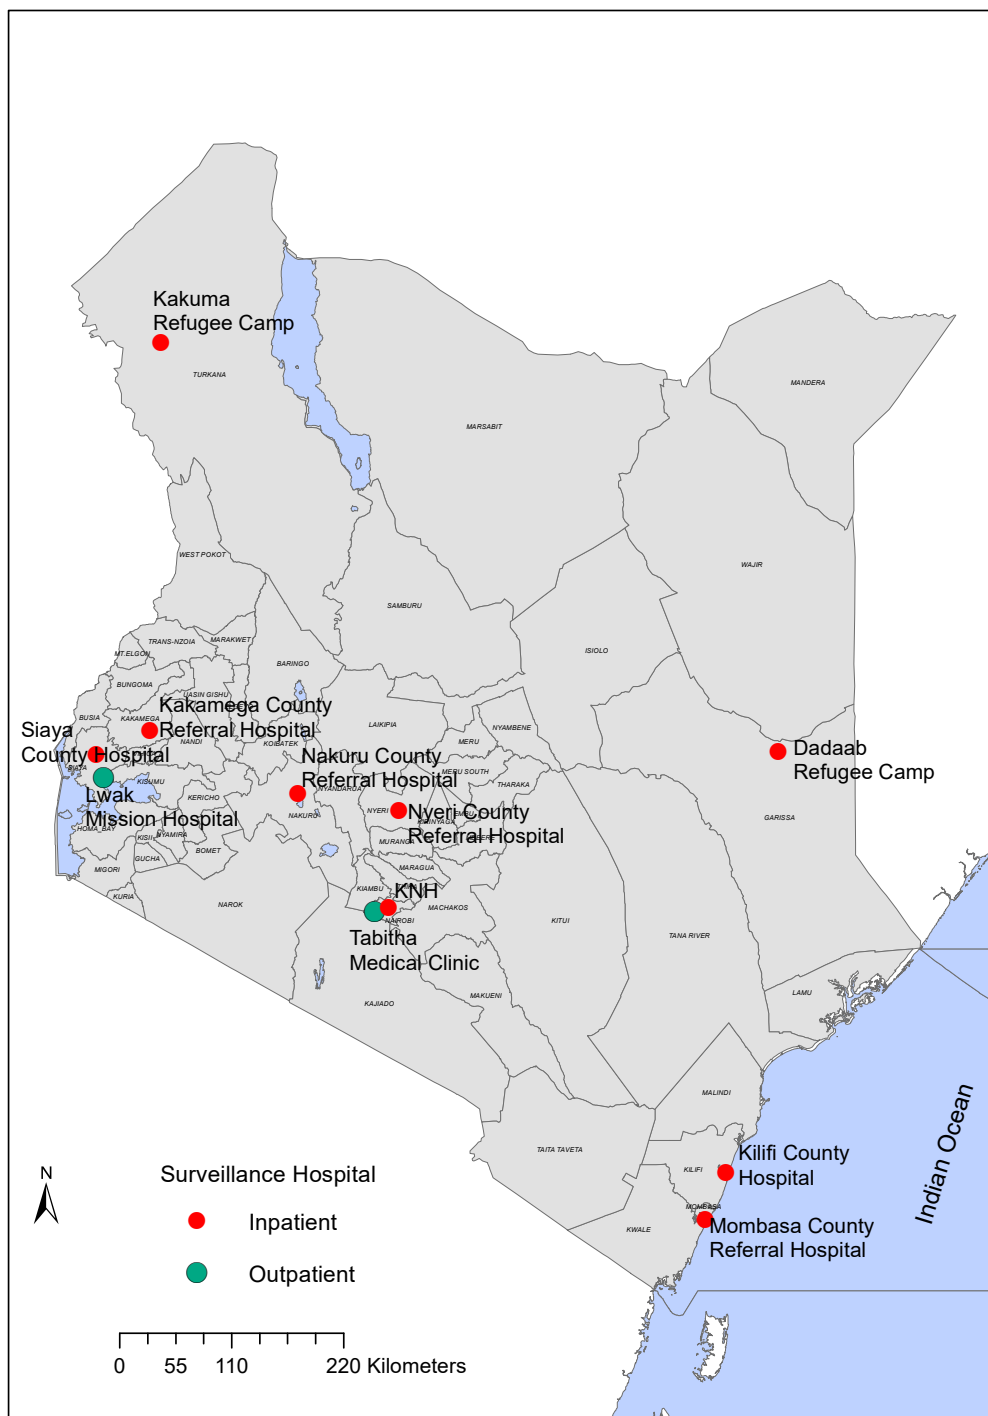

551  
552 **Figure 1:** Map of Kenya showing the geo-location of the 11 respiratory surveillance  
553 sites, distinguishing inpatient (red markers) from outpatient (green markers) facilities.



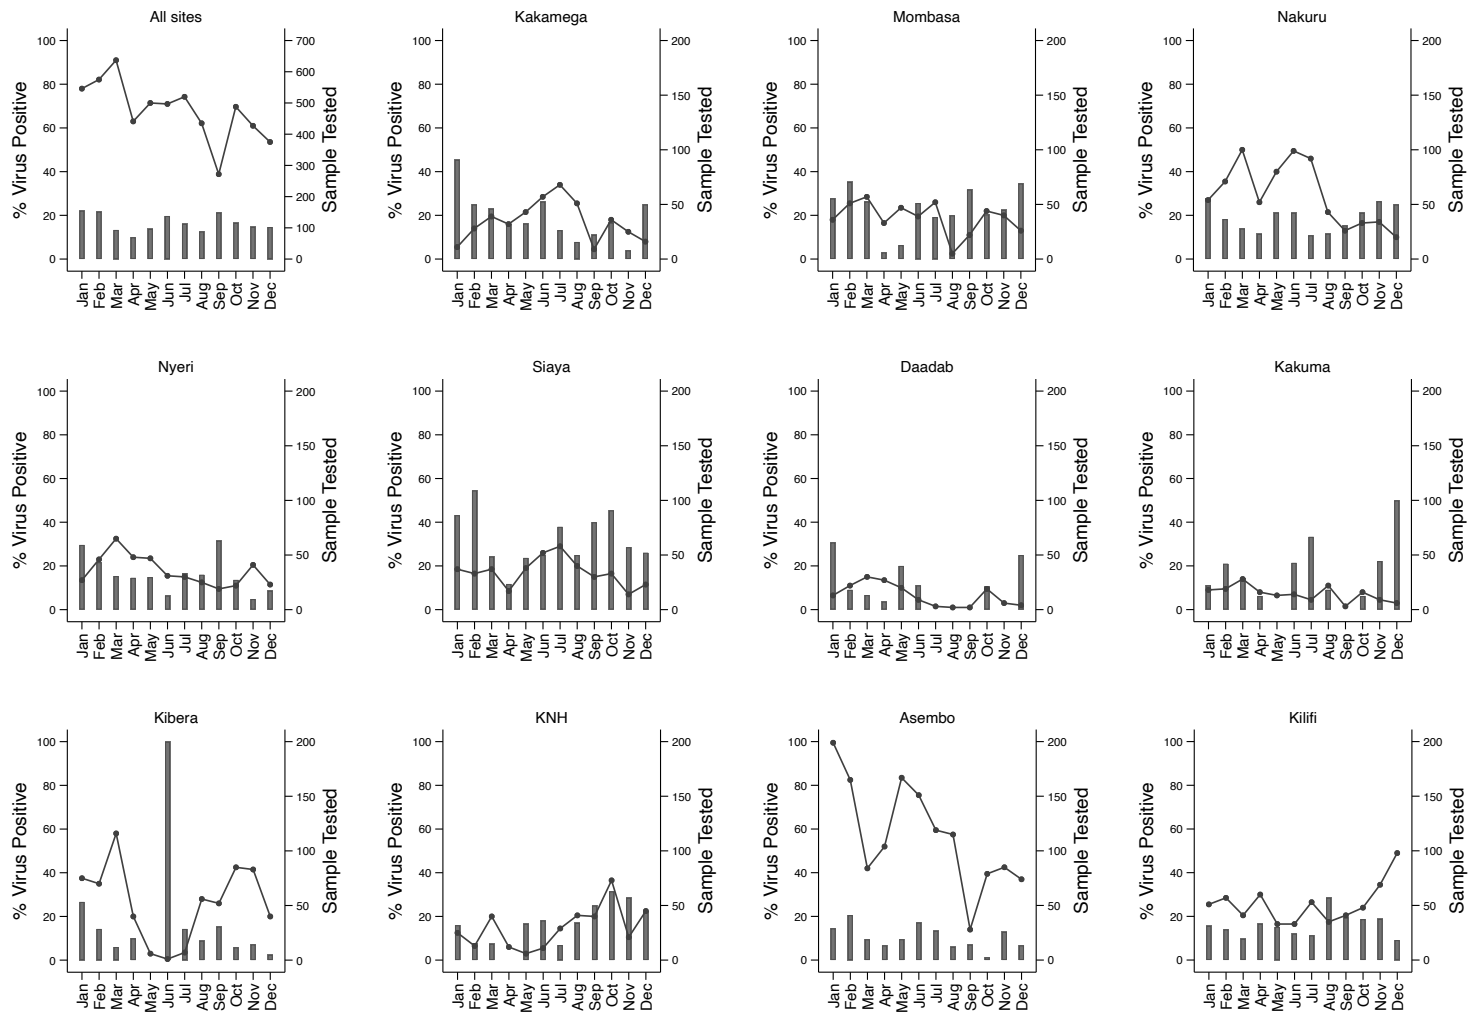

554

555 **Figure 2:** Monthly distribution of samples tested and cases positives for rhinovirus from the 11 surveillance sites in Kenya in 2014.

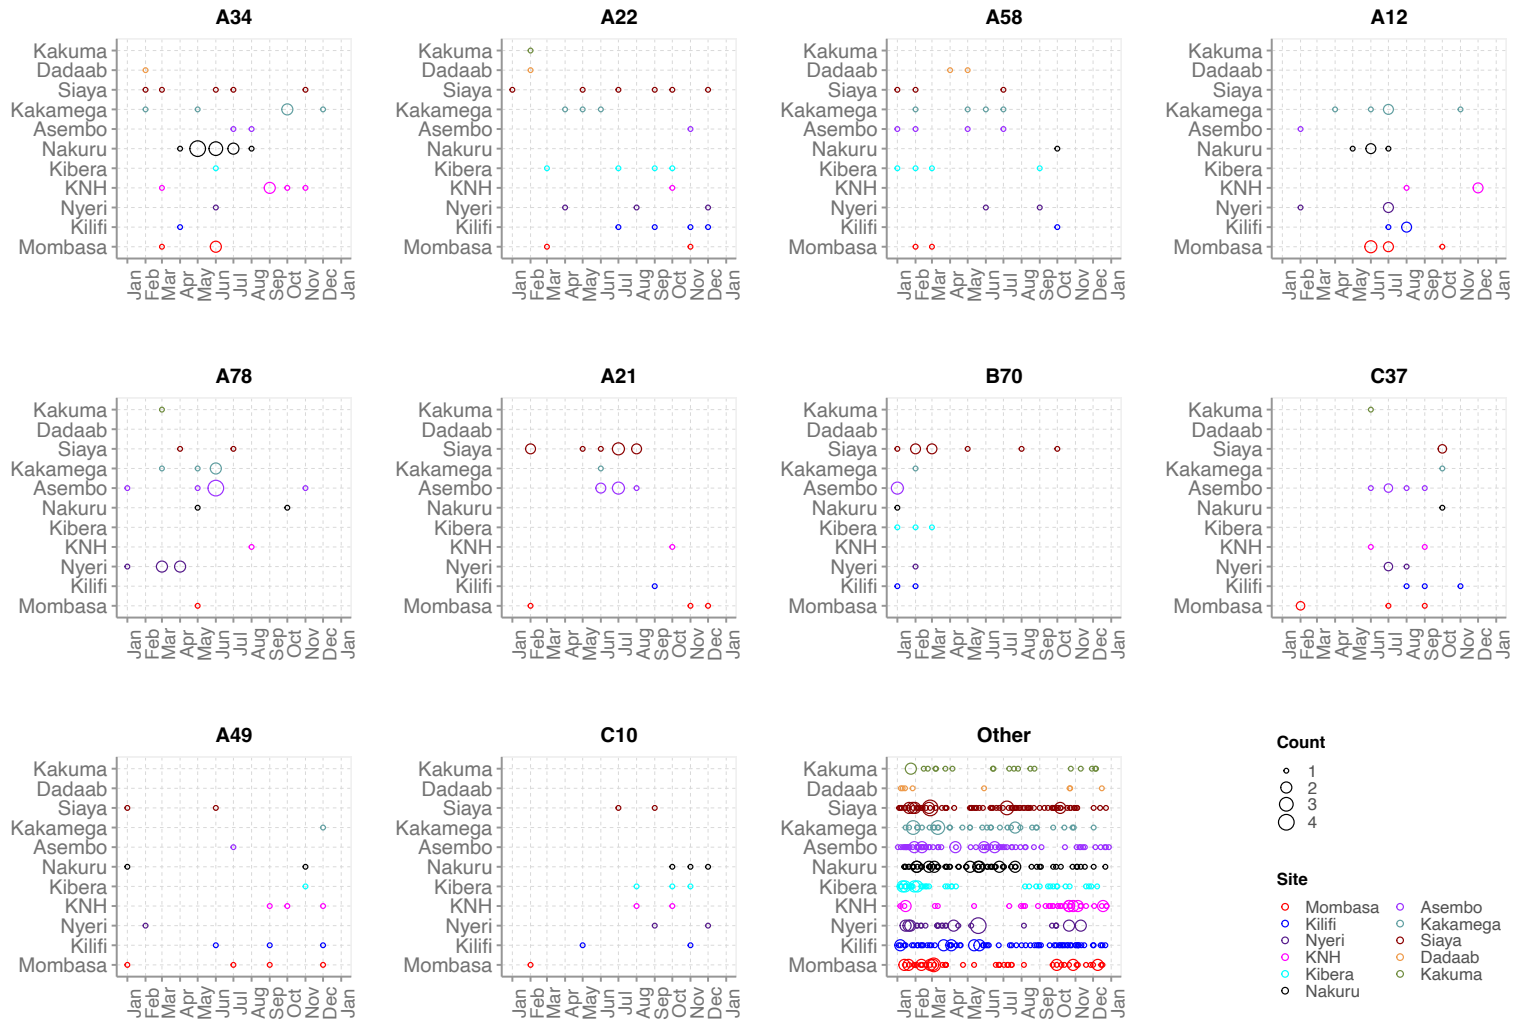

556

557 **Figure 3:** Temporal distributions of frequent RV types across different sites.

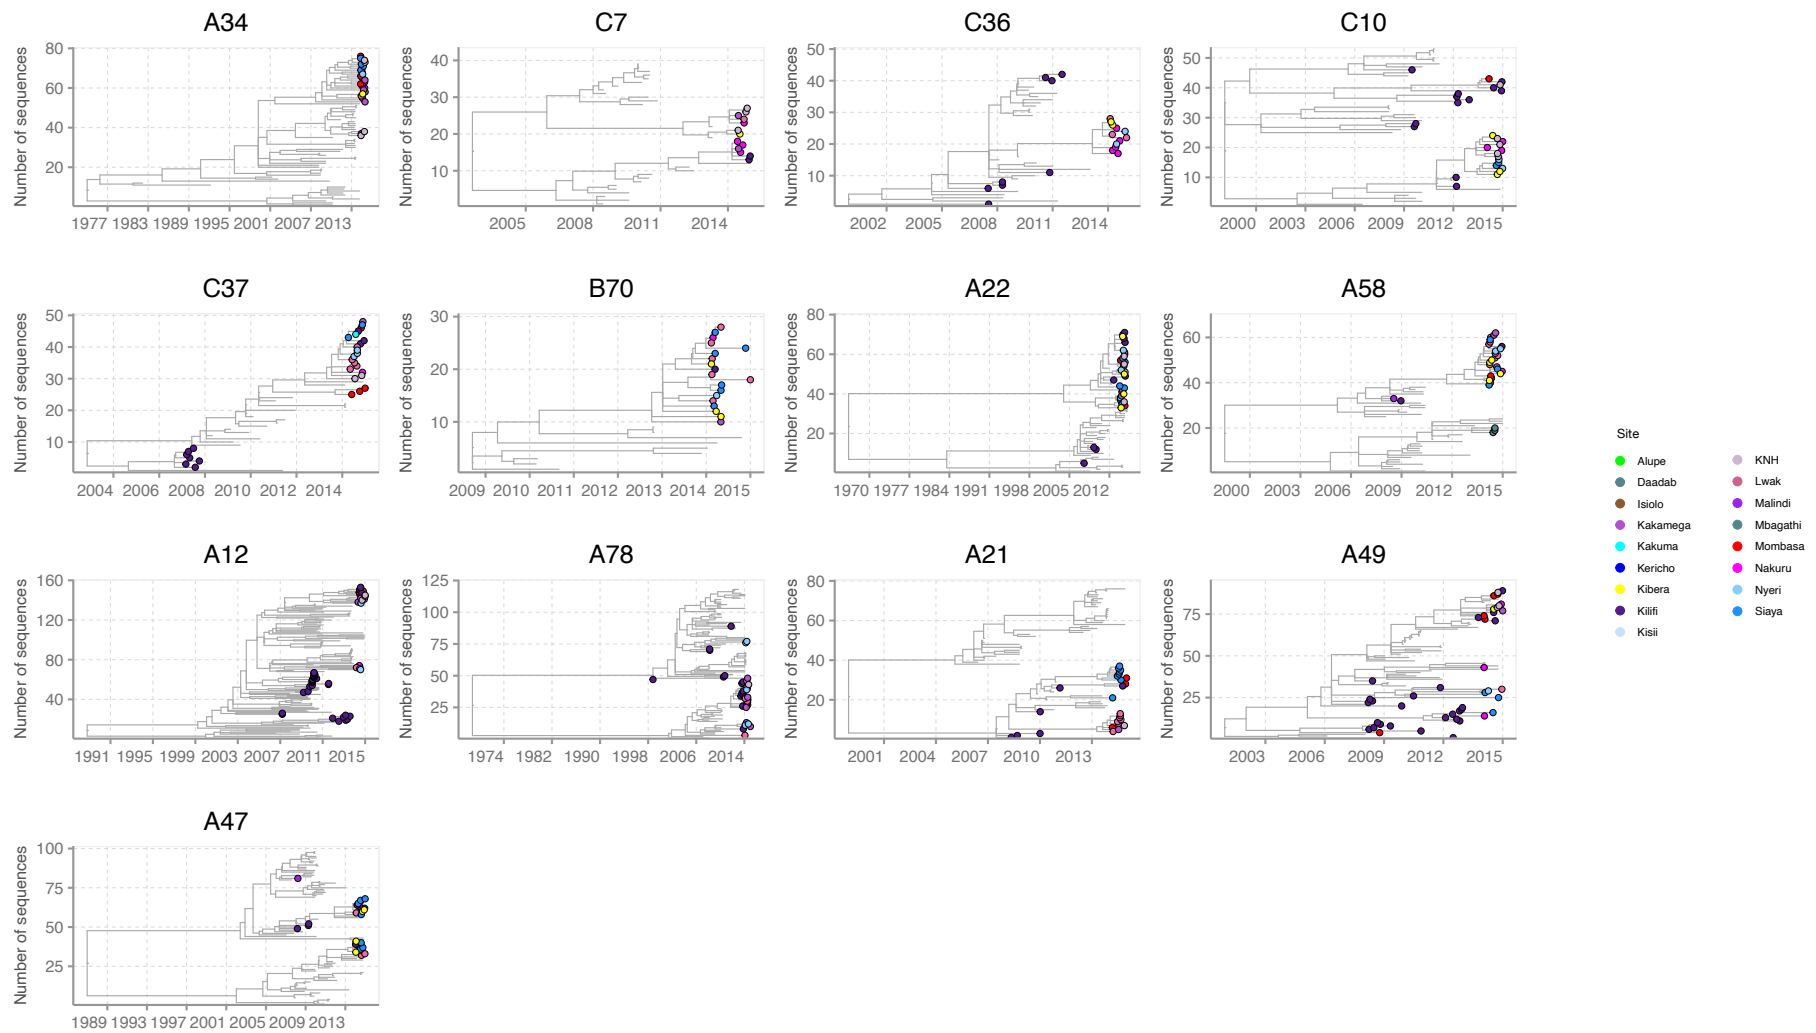

558

559 **Figure 4:** Time-resolved lineage-specific phylogenetic trees for prevalent RV types. The Kenya genomes are indicated with filled

560 circles coloured by site.
