# Supplementary material for: Spatio-temporal distribution of rhinovirus types in Kenya: A retrospective analysis, 2014
Source: bioRxiv or medRxiv preprint supplement (doi:10.1101/2024.04.02.24305207), 2024-04-03
Supplement: Supplementary file [file media-1.pdf]

**Supplementary Table 1:** Rhinovirus types identified in Kenya in 2014

| <b>RV-A</b> |            |            |            |            |             |            |            |             |             |            |            |            |               |            |            |             |               |            |             |
|-------------|------------|------------|------------|------------|-------------|------------|------------|-------------|-------------|------------|------------|------------|---------------|------------|------------|-------------|---------------|------------|-------------|
| <b>A34</b>  | <b>A22</b> | <b>A58</b> | <b>A12</b> | <b>A78</b> | <b>A21</b>  | <b>A49</b> | <b>A61</b> | <b>A81</b>  | <b>A54</b>  | <b>A20</b> | <b>A82</b> | <b>A10</b> | <b>A47</b>    | <b>A55</b> | <b>A63</b> | <b>A103</b> | <b>A106</b>   | <b>A13</b> | <b>A31</b>  |
| 35          | 30         | 27         | 25         | 23         | 21          | 20         | 16         | 16          | 15          | 14         | 12         | 11         | 11            | 10         | 10         | 9           | 9             | 9          | 9           |
| <b>A43</b>  | <b>A89</b> | <b>A38</b> | <b>A90</b> | <b>A29</b> | <b>A33</b>  | <b>A94</b> | <b>A53</b> | <b>A80</b>  | <b>A104</b> | <b>A16</b> | <b>A28</b> | <b>A65</b> | <b>A68</b>    | <b>A11</b> | <b>A18</b> | <b>A23</b>  | <b>A40</b>    | <b>A1</b>  | <b>A101</b> |
| 9           | 9          | 8          | 8          | 7          | 7           | 7          | 6          | 6           | 5           | 5          | 5          | 5          | 5             | 4          | 4          | 4           | 4             | 3          | 3           |
| <b>A30</b>  | <b>A36</b> | <b>A39</b> | <b>A46</b> | <b>A51</b> | <b>A105</b> | <b>A59</b> | <b>A62</b> | <b>A96</b>  | <b>A102</b> | <b>A15</b> | <b>A2</b>  | <b>A45</b> | <b>A56</b>    | <b>A67</b> | <b>A77</b> | <b>A8</b>   | <b>A88</b>    |            |             |
| 3           | 3          | 3          | 3          | 3          | 2           | 2          | 2          | 2           | 1           | 1          | 1          | 1          | 1             | 1          | 1          | 1           | 1             |            |             |
| <b>RV-B</b> |            |            |            |            |             |            |            |             |             |            |            |            |               |            |            |             |               |            |             |
| <b>B70</b>  | <b>B92</b> | <b>B26</b> | <b>B4</b>  | <b>B42</b> | <b>B27</b>  | <b>B35</b> | <b>B91</b> | <b>B102</b> | <b>B17</b>  | <b>B3</b>  | <b>B69</b> | <b>B79</b> | <b>B83</b>    | <b>B93</b> | <b>B97</b> |             |               |            |             |
| 19          | 9          | 8          | 5          | 5          | 3           | 3          | 2          | 1           | 1           | 1          | 1          | 1          | 1             | 1          | 1          |             |               |            |             |
| <b>RV-C</b> |            |            |            |            |             |            |            |             |             |            |            |            |               |            |            |             |               |            |             |
| <b>C37</b>  | <b>C10</b> | <b>C46</b> | <b>C27</b> | <b>C14</b> | <b>C7</b>   | <b>C36</b> | <b>C15</b> | <b>C43</b>  | <b>C18</b>  | <b>C35</b> | <b>C40</b> | <b>C47</b> | <b>C16</b>    | <b>C25</b> | <b>C42</b> | <b>C48</b>  | <b>Cpat19</b> | <b>C12</b> | <b>C1</b>   |
| 22          | 18         | 15         | 14         | 13         | 13          | 12         | 10         | 9           | 8           | 8          | 8          | 8          | 6             | 6          | 6          | 6           | 5             | 5          | 4           |
| <b>C26</b>  | <b>C3</b>  | <b>C33</b> | <b>C6</b>  | <b>C9</b>  | <b>C23</b>  | <b>C31</b> | <b>C39</b> | <b>C17</b>  | <b>C21</b>  | <b>C28</b> | <b>C29</b> | <b>C49</b> | <b>Cpat27</b> | <b>C11</b> | <b>C13</b> | <b>C19</b>  | <b>C22</b>    | <b>C30</b> | <b>C38</b>  |
| 4           | 4          | 4          | 4          | 4          | 3           | 3          | 3          | 2           | 2           | 2          | 2          | 2          | 1             | 1          | 1          | 1           | 1             | 1          | 1           |

**Supplementary Table 2:** Comparative analysis of ARI definitions and care settings across the three rhinovirus species (A, B, and C).

|                                              | RV Species   |              |              | Total | p-value |
|----------------------------------------------|--------------|--------------|--------------|-------|---------|
|                                              | RV A         | RV B         | RV C         |       |         |
| <b>ARI definition</b>                        |              |              |              |       |         |
| <b>ALRTI &amp; ILI</b>                       | 87 (17.68%)  | 17 (26.98 %) | 44 (17.74%)  | 148   | 0.06    |
| <b>SARI &amp; ILI</b>                        | 33 (6.71%)   | 1 (1.59%)    | 28 (11.29%)  | 62    |         |
| <b>SARI</b>                                  | 317 (64.43)  | 37 (58.73 %) | 140 (56.45%) | 494   |         |
| <b>Severe/VSevere Pneumonia</b>              | 55 (11.18%)  | 8 (12.69%)   | 36 (14.52%)  | 99    |         |
| <b>Care setting</b>                          |              |              |              |       |         |
| <b>Outpatient</b>                            | 87 (17.68%)  | 17 (26.98%)  | 44 (17.74%)  | 148   | 0.27    |
| <b>Inpatient</b>                             | 405 (82.31%) | 46 (73.01%)  | 204 (82.26%) | 655   |         |
| Abbreviation: ARI, Acute respiratory illness |              |              |              |       |         |

**A**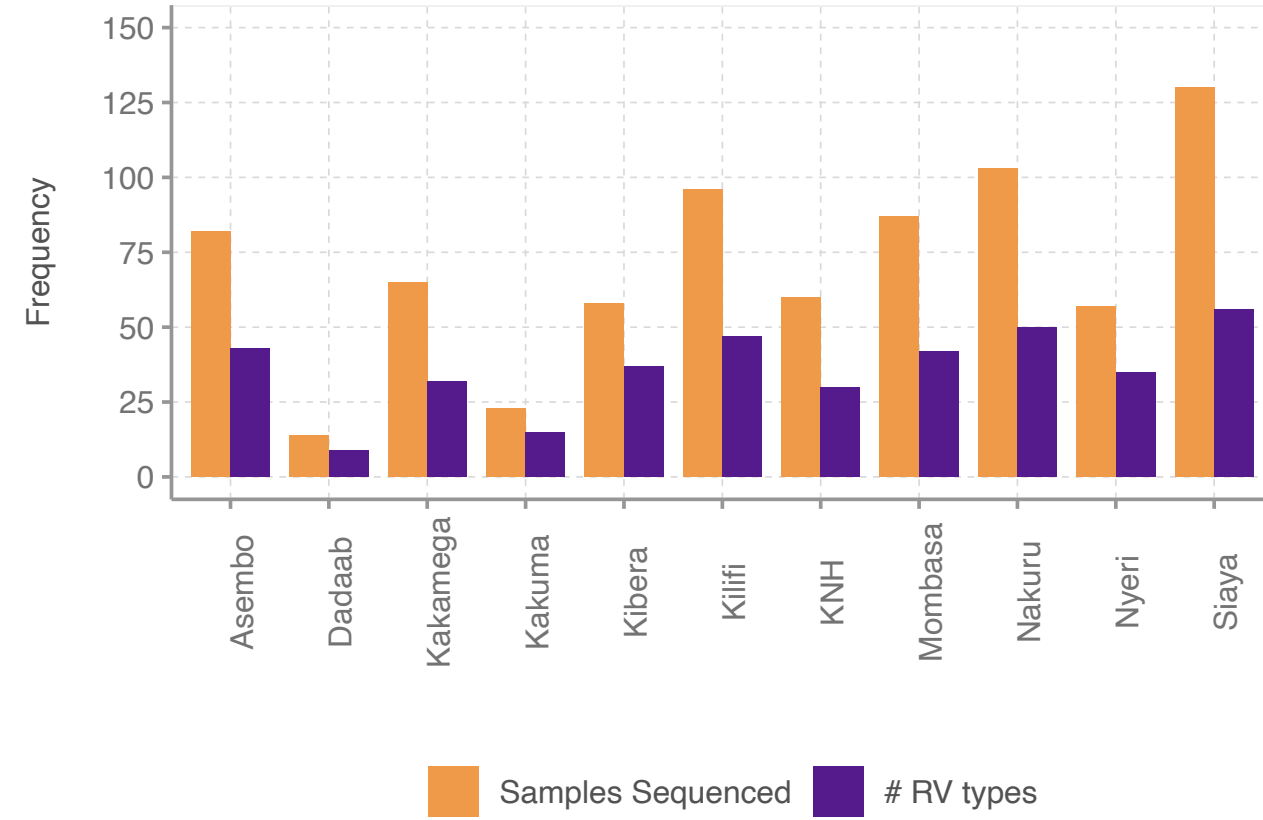**B**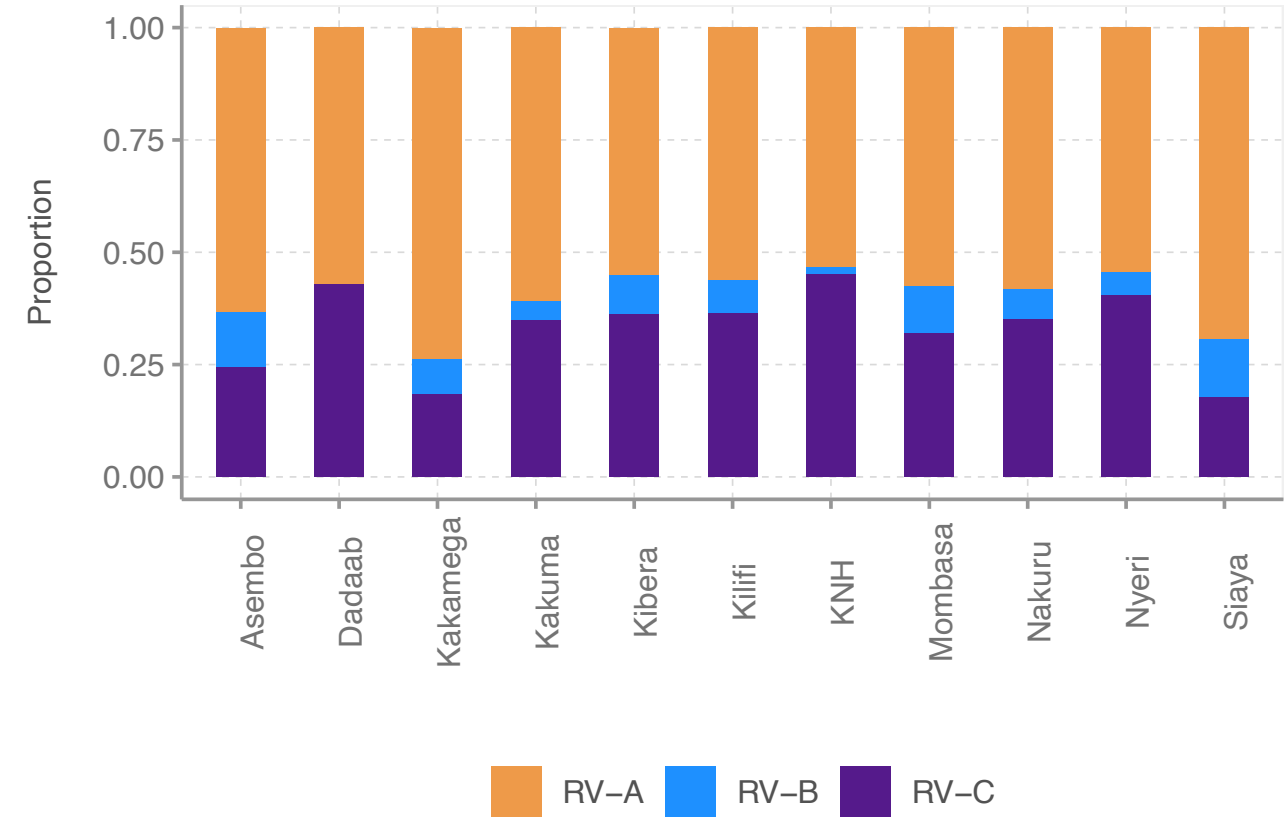

**Supplementary Figure 1:** (A) Number of samples sequenced per site versus number of types recorded B) Proportion of rhinovirus (RV) species detected per site

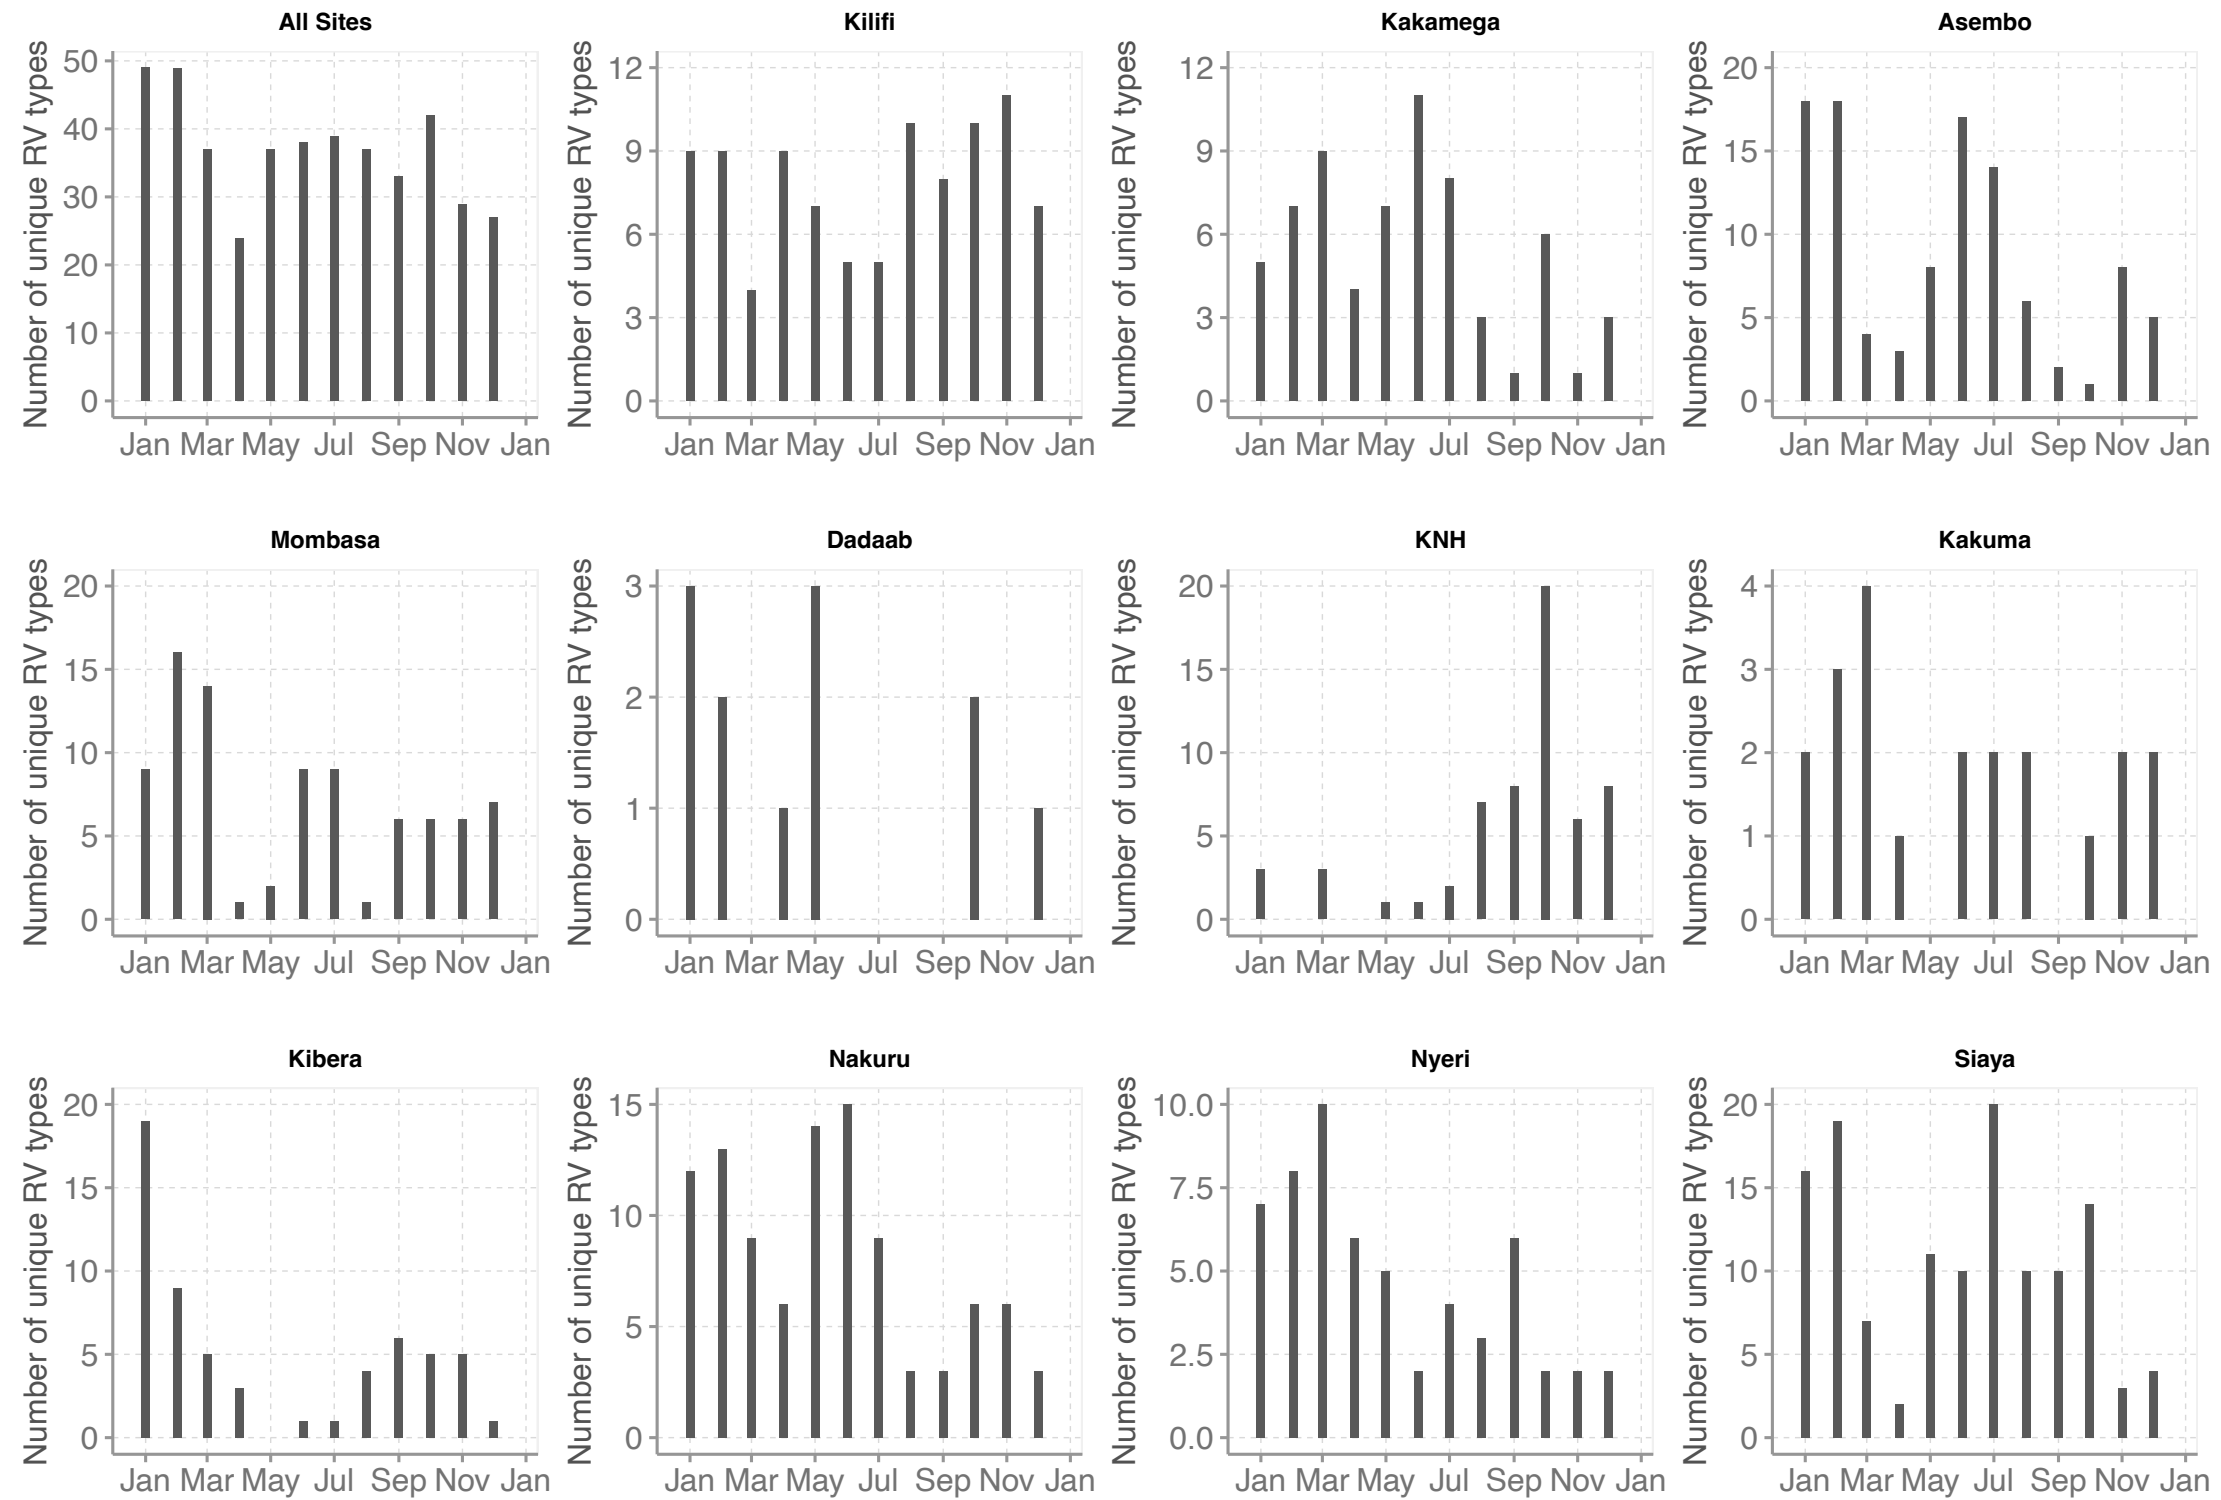

**Supplementary Figure 2:** Monthly frequency of RV types detected per study site

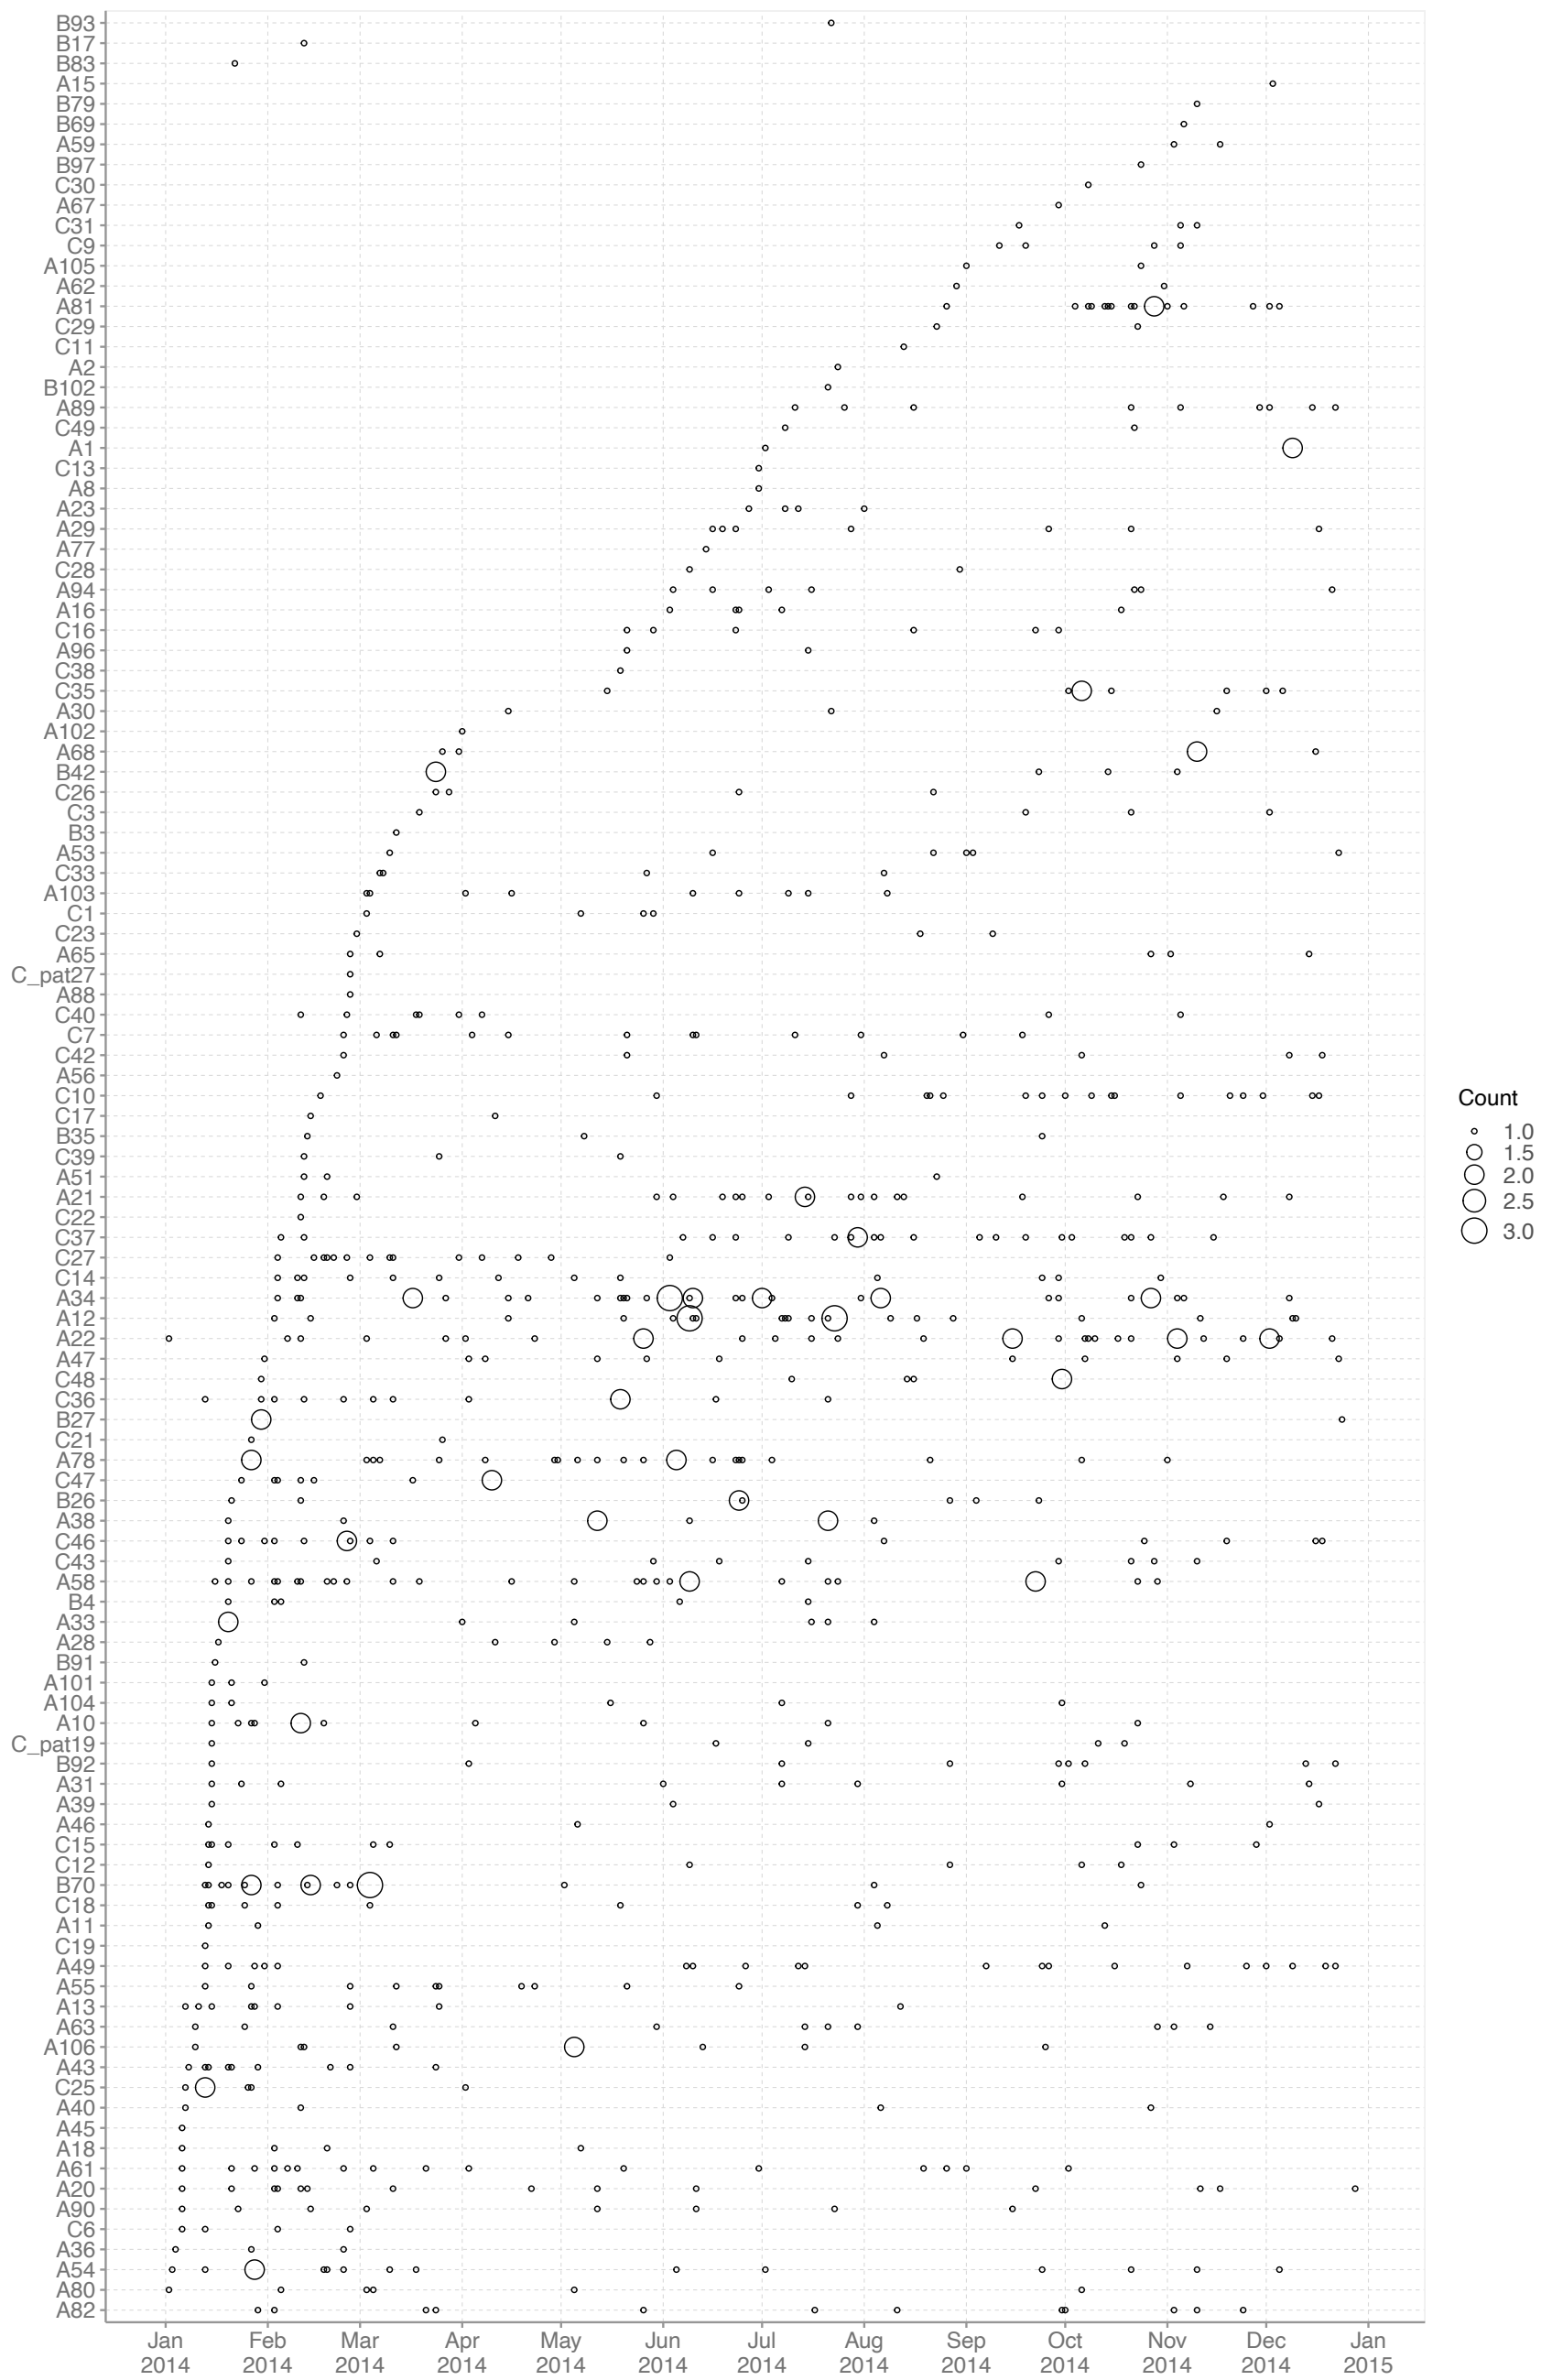

**Supplementary Figure 3: Monthly temporal occurrence plots for prevalent RV types**
